# Supplementary material for: Improved interfacial charge transfer and visible light activity of reduced graphene oxide–graphitic carbon nitride photocatalysts
Source: Royal Society of Chemistry journal article supplement (doi:10.1039/c5ra17967j), 2015-01-01
Supplement: c5ra17967j1.pdf [file c5ra17967j1.pdf]

## Supporting Information

### **Improved Interfacial Charge Transfer and Visible Light Activity of Reduced Graphene Oxide-Graphitic Carbon Nitride Photocatalysts**

Peggy Tiong,<sup>a</sup> Hendrik O. Lintang,<sup>b</sup> Salasiah Endud<sup>a</sup> and Leny Yuliaty<sup>\*b</sup>

---

*<sup>a</sup>Department of Chemistry, Faculty of Science, Universiti Teknologi Malaysia, 81310 UTM Johor Bahru, Malaysia*

*<sup>b</sup>Centre for Sustainable Nanomaterials, Ibnu Sina Institute for Scientific and Industrial Research, Universiti Teknologi Malaysia, 81310 UTM Johor Bahru, Malaysia*

*\*E-mail: leny@ibnusina.utm.my*

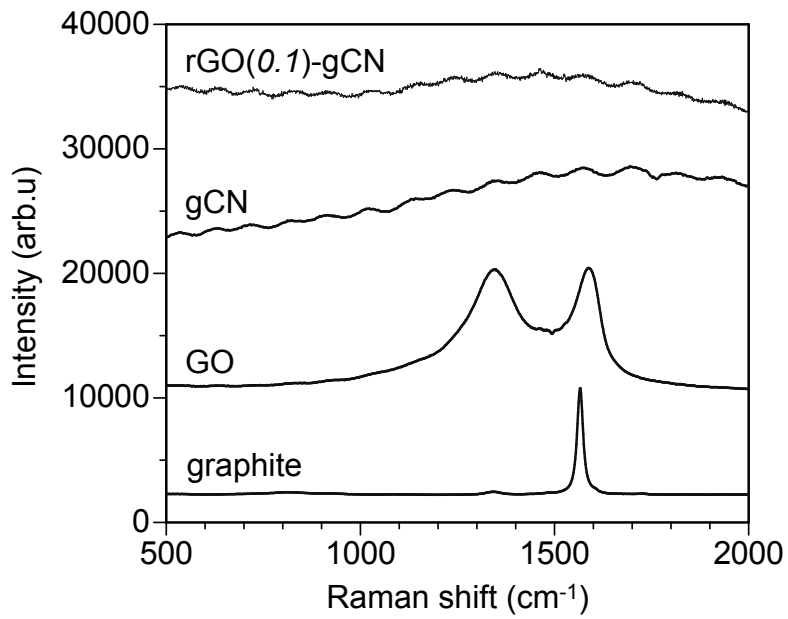

**Fig. S1** Raman spectra of the graphite flakes, GO, gCN and rGO(0.1)-gCN

From Fig. S1, the graphene exhibited one sharp G band, while GO displayed two distinct peaks at 1347 and 1590 cm<sup>-1</sup>, which were attributed to the D and G bands, respectively. As for the gCN and rGO(0.1)-gCN samples, no prominent peaks were observed due to the strong fluorescence background from the gCN.

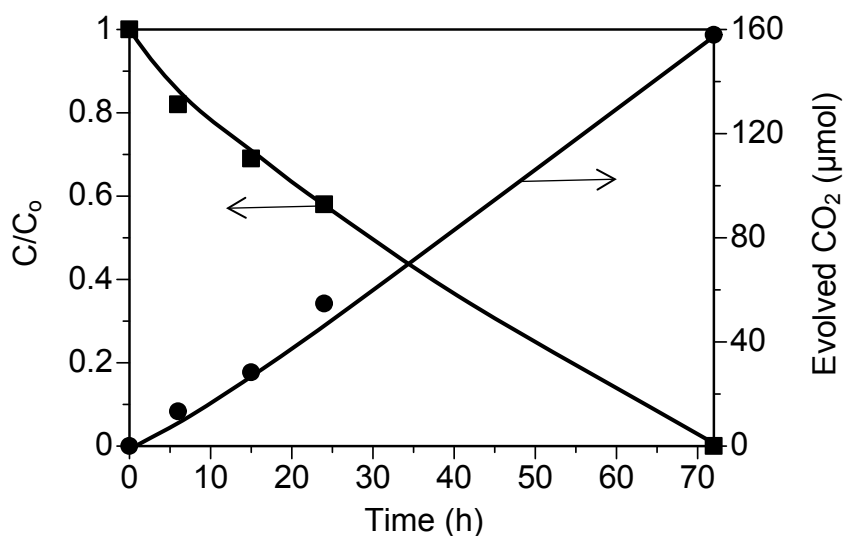

**Fig. S2** The ratio of converted phenol ( $C/C_0$ ) and the evolution of  $CO_2$  gas during degradation of phenol under visible light irradiation over the rGO(0.1)-gCN photocatalyst.

**Table S1** The ratio between the experimentally detected  $CO_2$  and the one calculated from converted phenol

| Time (h) | Detected $CO_2$ ( $\mu\text{mol}$ ) <sup>a</sup> | Calculated $CO_2$ ( $\mu\text{mol}$ ) <sup>b</sup> | Ratio |
|----------|--------------------------------------------------|----------------------------------------------------|-------|
| 6        | 13.29                                            | 28.75                                              | 0.46  |
| 15       | 28.28                                            | 49.41                                              | 0.57  |
| 24       | 54.73                                            | 66.08                                              | 0.83  |
| 72       | 157.87                                           | 159.39                                             | 0.99  |

<sup>a</sup>The  $CO_2$  was obtained from experimental results. <sup>b</sup>The  $CO_2$  was calculated by assumption that total degradation of phenol occurred. If total degradation of phenol occurs, 1 mol of phenol will produce 6 mol of  $CO_2$ .

Fig. S2 shows that  $CO_2$  was produced continuously under visible light irradiation in the presence of rGO(0.1)-gCN as the photocatalyst. Table S1 shows the calculated ratio between the experimentally evolved  $CO_2$  and expected one from the converted phenol. When most of phenol was degraded, the ratio was very close to one. This result strongly indicated that the total degradation of phenol to  $CO_2$  and  $H_2O$  occurred on the rGO(0.1)-gCN photocatalyst.

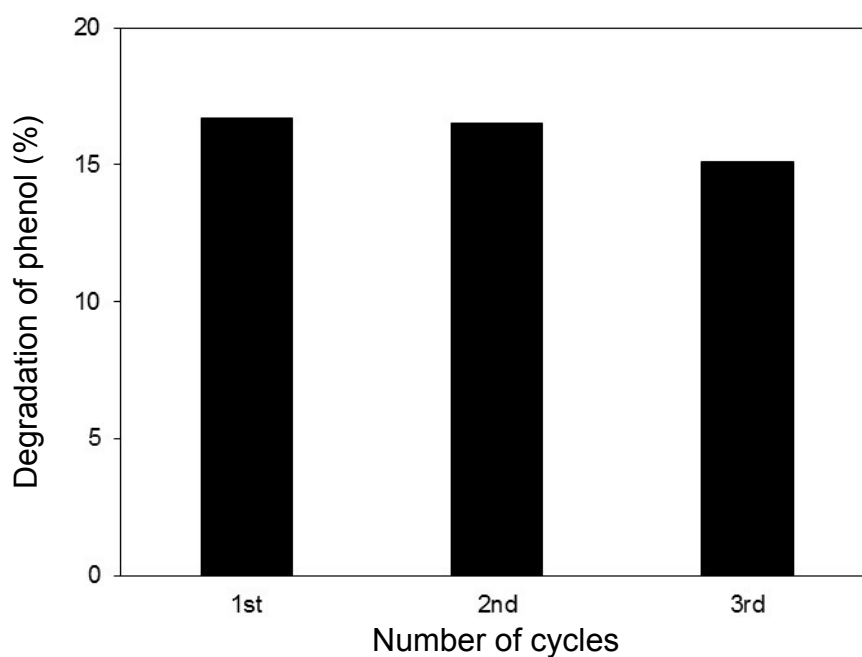

**Fig. S3** Reusability of the rGO(0.1)-gCN for degradation of phenol under 3 h visible light irradiation.

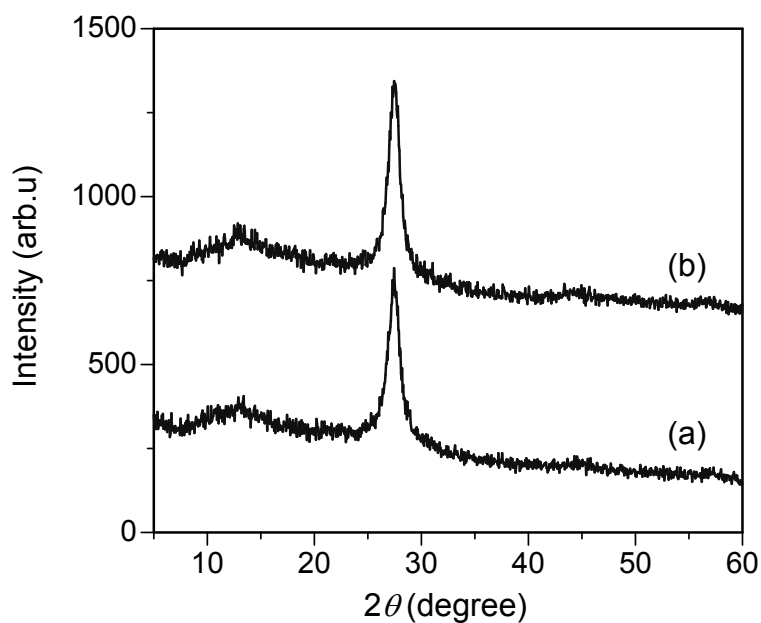

**Fig. S4** XRD patterns of the rGO(0.1)-gCN (a) before, and (b) after three successive cycles of photocatalytic reaction.

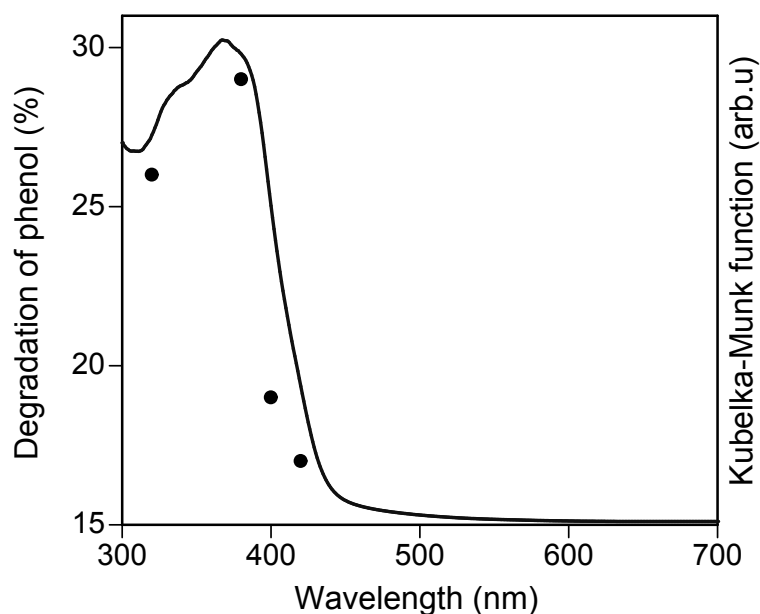

**Fig. S5** DR UV-Vis spectrum of the rGO(0.1)-gCN (line) and the degradation of phenol (closed circle) under different light wavelengths using cut-off filters at 320, 380, 400 and 420 nm.

### Calculation of quantum efficiency

Quantum efficiency was calculated from the percentage ratio between the number of converted phenol and number of absorbed photon as shown in Eq. (1).

$$\text{Quantum efficiency} = \frac{N_{\text{converted}}}{N_{\text{photon}}} \times 100\%$$

(1)

The number of converted phenol was calculated from Eq. (2), while the number of adsorbed photon was determined from Eq. (3) and (4).

$$N_{\text{converted}} = \frac{\text{No. of mol of converted phenol}}{\text{time}} \text{ (mol s}^{-1}\text{)}$$

(2)

$$N_{\text{photon}} = \frac{I \times A}{U_{\lambda}} \text{ (mol s}^{-1}\text{)}$$

(3),

where  $I$  is the light intensity absorbed by the photocatalyst ( $97.6 \mu\text{W cm}^{-2}$ ),  $A$  is the area of the reactor with the photocatalyst exposed to the light ( $16.7 \text{ cm}^2$ ),  $U_{\lambda}$  is the mole photon energy of the representative wavelength.

$$U_{\lambda} = \frac{hc \times N_A}{\lambda} (J \text{ mol}^{-1})$$

(4),

where  $h$  is the Plank constant,  $c$  is the speed of light in vacuum,  $N_A$  is the Avogadro number,  $\lambda$  is the representative wavelength of the light source used (365 nm).
